# Supplementary material for: Nitrogen doped high quality CVD grown graphene as a fast responding NO2gas sensor
Source: Royal Society of Chemistry journal article supplement (doi:10.1039/c8nj00885j), 2018-01-01
Supplement: c8nj00885j1.pdf [file c8nj00885j1.pdf]

## †Electronic Supplementary Information (ESI)

### Nitrogen doped high quality CVD grown graphene as a fast responding NO<sub>2</sub> gas sensor

Shubhda Srivastava,<sup>ab</sup> Pradeep Kumar Kashyap,<sup>ab</sup> Vidyanand Singh,<sup>a</sup> T. D. Senguttuvan<sup>\*a</sup> and Bipin Kumar Gupta<sup>\*a</sup>

<sup>a</sup>CSIR- National Physical Laboratory, Dr K S Krishnan Road, New Delhi, 110012, India.

<sup>b</sup>Academy of Scientific and Innovative Research (AcSIR), CSIR- National Physical Laboratory Campus, Dr K S Krishnan Road, New Delhi 110012, India

\*Email: [tdsen@nplindia.org](mailto:tdsen@nplindia.org), [bipinbhu@yahoo.com](mailto:bipinbhu@yahoo.com)

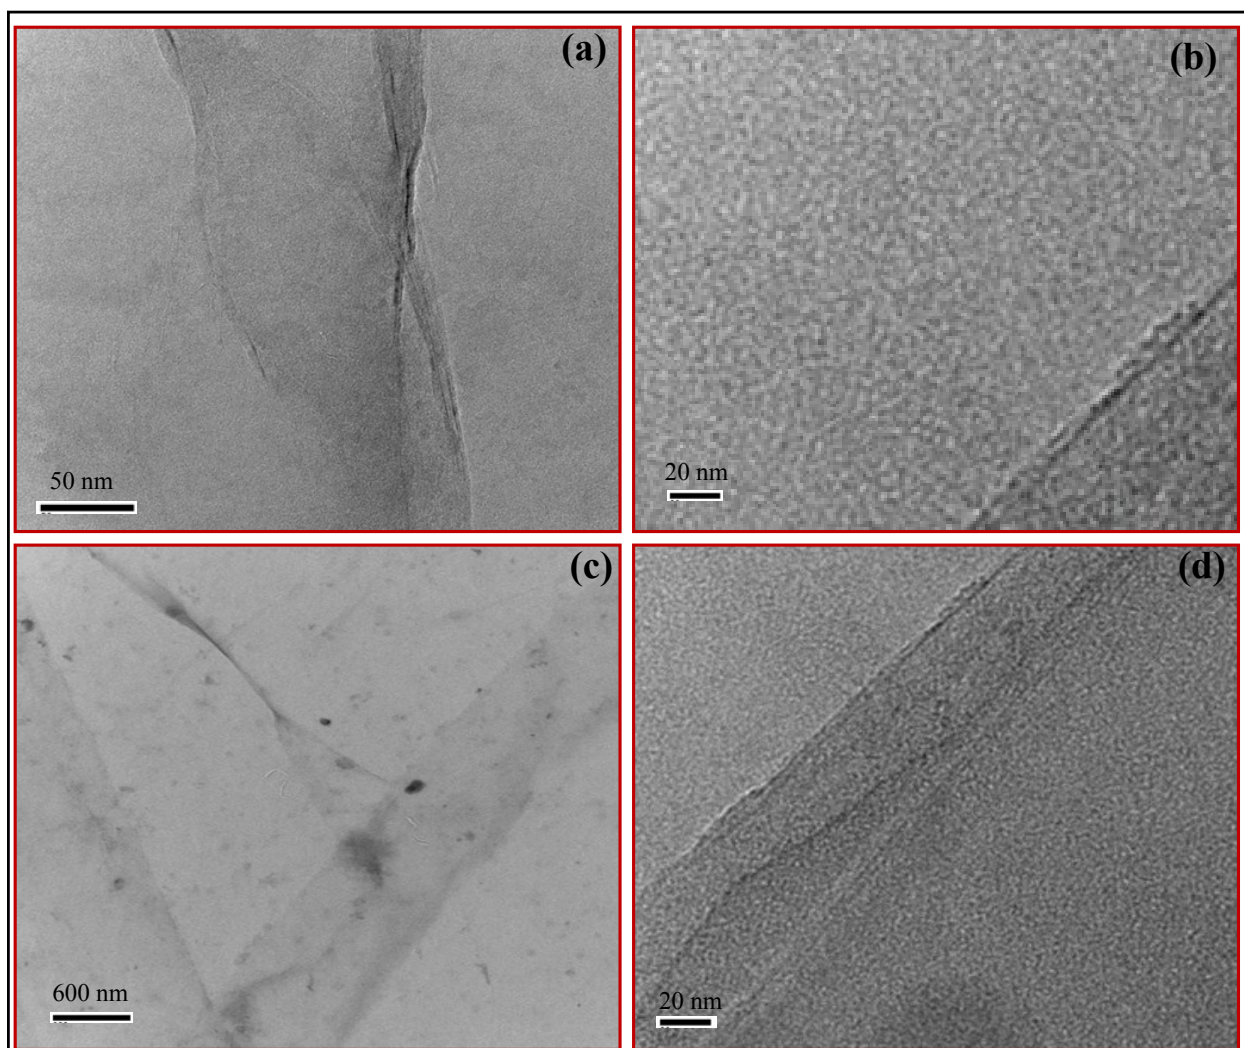

**Figure S1:** TEM images of (a) Gr and (c) NGr and HRTEM images of (b) Gr and (d) NGr showing number of layers.

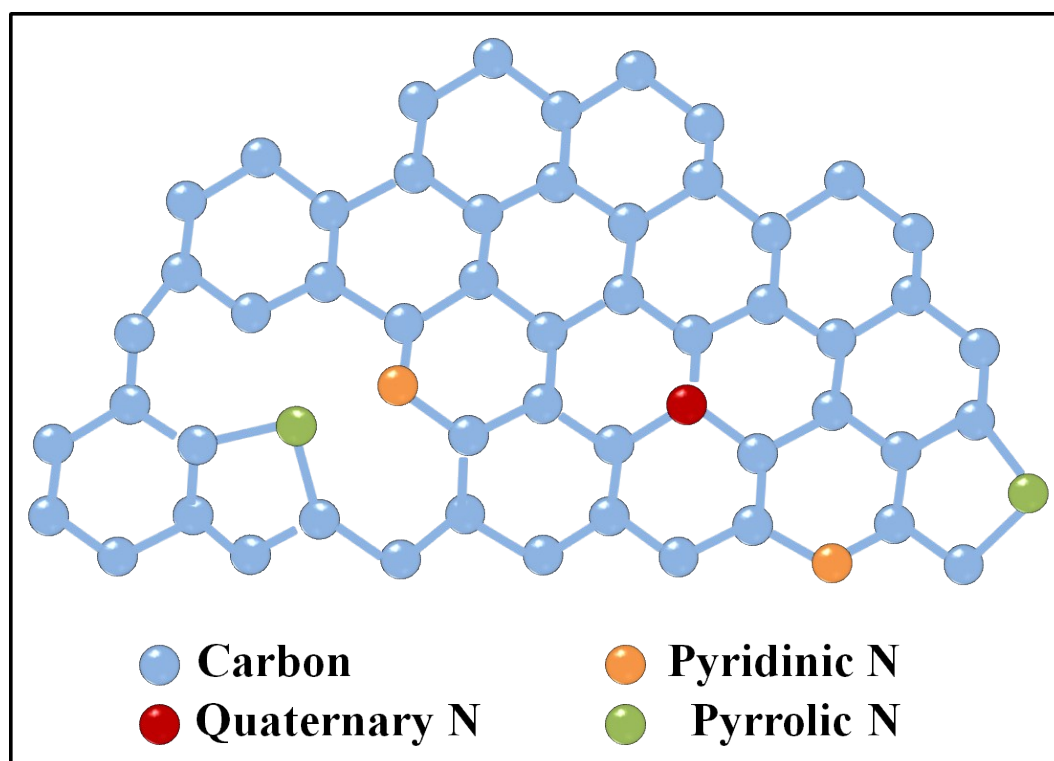

**Figure S2:** Possible configurations of nitrogen doping in graphene.

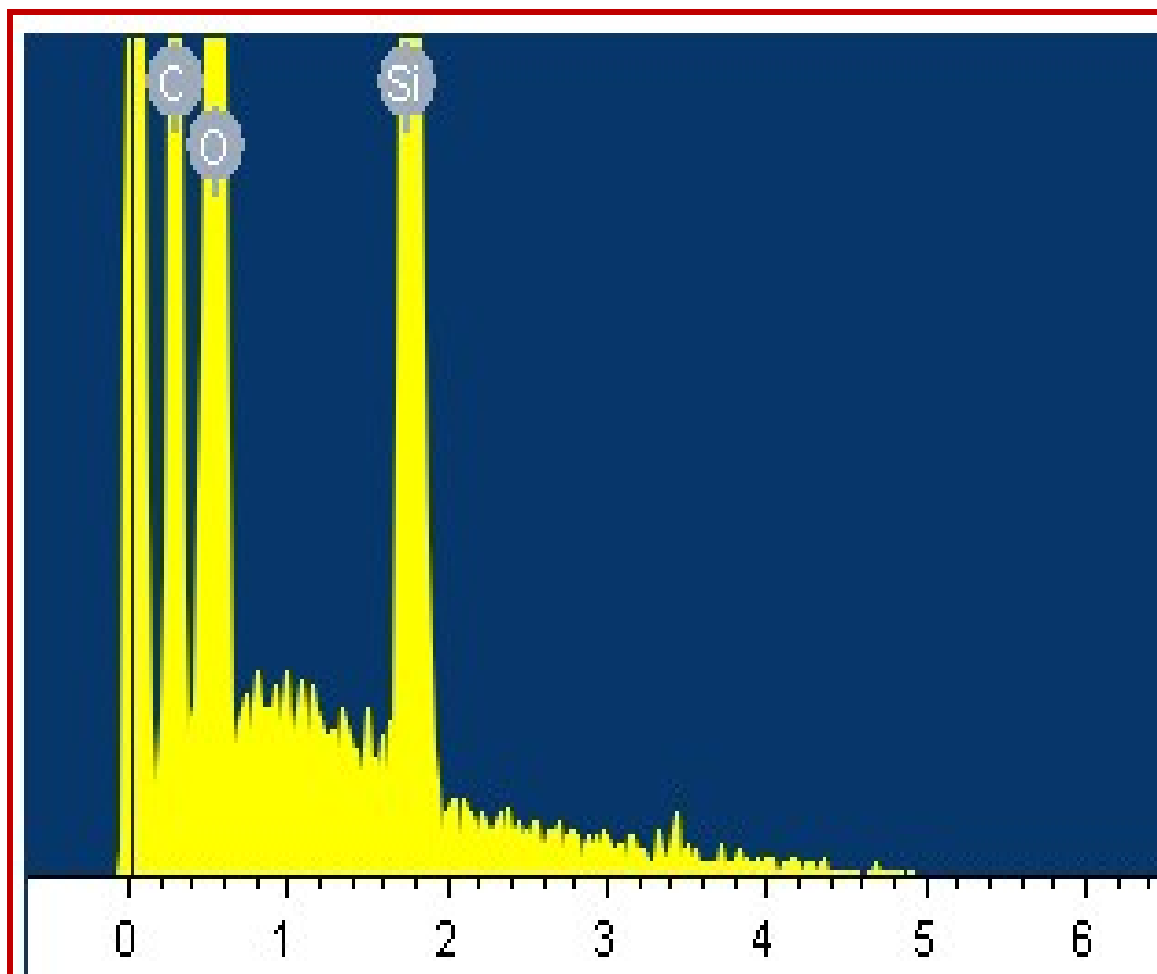

**Figure S3:** EDX spectrum of small physical area of Gr film.

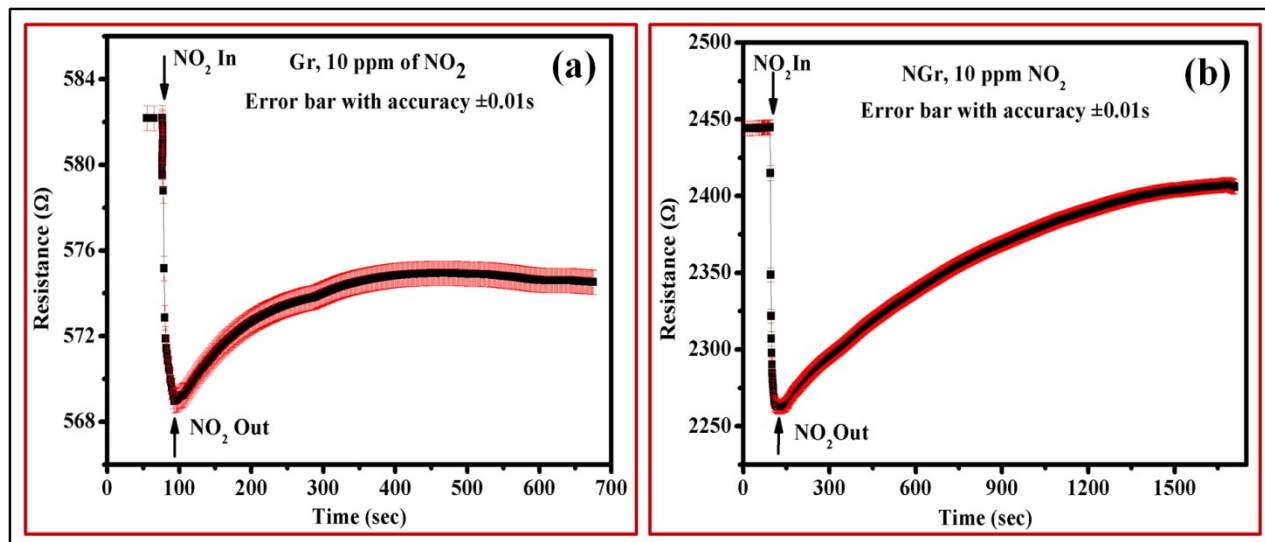

**Figure S4:** Response and recovery curves of (a) Gr and (b) NGr 10 ppm of  $\text{NO}_2$  with error bar and accuracy values in time.

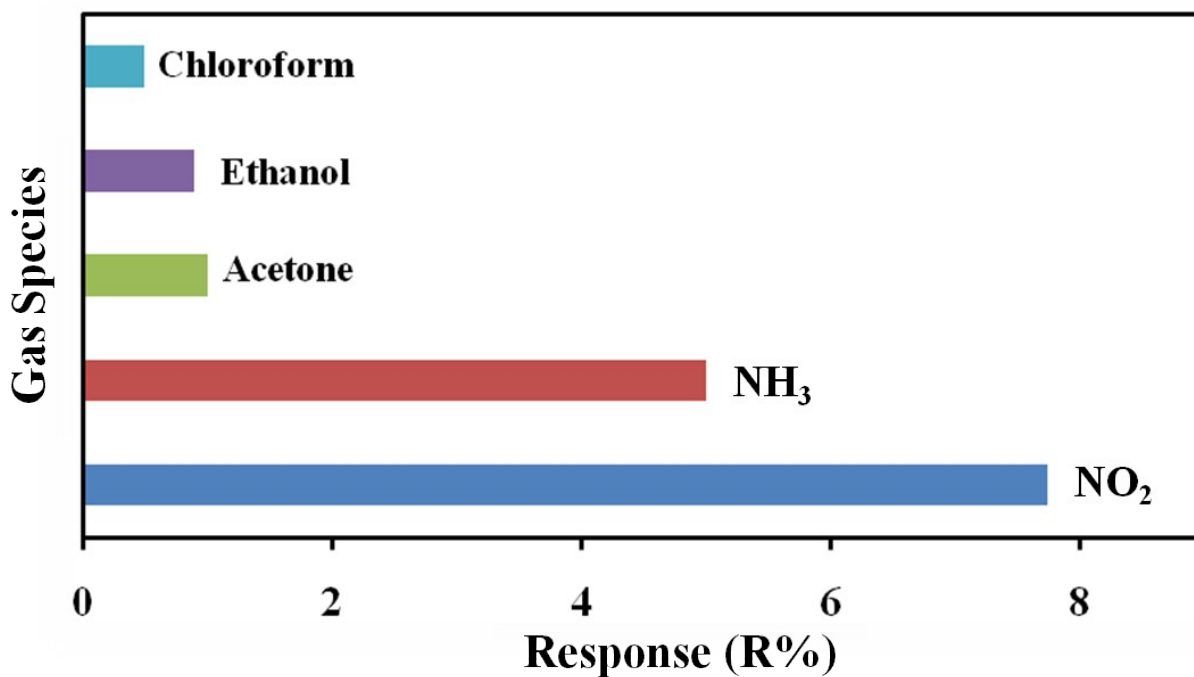

**Figure S5:** The selectivity of the NGr sensor for 10 ppm  $\text{NO}_2$ ,  $\text{NH}_3$ , Acetone, Ethanol and Chloroform at room temperature.
